# Supplementary material for: Insight into the preferred formation mechanism of long-chain hydrocarbons in Fischer–Tropsch synthesis on Hcp Co(10−11) surfaces from DFT and microkinetic modeling
Source: Royal Society of Chemistry journal article supplement (doi:10.1039/c7cy01436h), 2017-01-01
Supplement: c7cy01436h1.pdf [file c7cy01436h1.pdf]

## Supplementary material

# Insight into the Preferable Formation Mechanism of Long-Chain Hydrocarbons in Fischer-Tropsch Synthesis on Hcp Co(10-11) Surface from DFT and Microkinetic Modeling

Hongxia Liu<sup>a</sup> Riguang Zhang<sup>a,\*</sup> Lixia Ling<sup>a</sup> Qiang Wang<sup>b</sup> Baojun Wang<sup>a,\*</sup> Debao Li<sup>b</sup>

<sup>a</sup> Key Laboratory of Coal Science and Technology of Ministry of Education and Shanxi Province, Taiyuan University of Technology, Taiyuan 030024, Shanxi, P.R. China

<sup>b</sup> State Key Laboratory of Coal Conversion, Institute of Coal Chemistry, Chinese Academy of Science, Taiyuan 030001, Shanxi, PR China

## 1. The effect of translational entropy

In the studies by Cortright *et al.*,<sup>1</sup> as for the weakly bound species, CH<sub>4</sub> and CO<sub>2</sub>, assuming that both behave as two dimensional gases and maintain the full rotational and vibrational modes of the corresponding gaseous species. The translational, rotational contributions are taken into account for gaseous species and transition states in the reaction. For a gas molecule moving in the three-dimensional (3D) space, the standard molar translational internal energy is

$$U_{\text{trans-3D}}^{\circ} = \frac{3}{2}RT$$

The standard molar translational entropy follows:

$$S_{\text{trans-3D}}^{\circ} = R \left[ \ln \left( \frac{(2\pi mk_{\text{B}}T)^{3/2}}{h^3} \right) + \ln \left( \frac{V}{N_{\text{g}}} \right) + \frac{5}{2} \right]$$

where *m* is the mass of the molecule and *V/N<sub>g</sub>* is the volume per molecule in the standard state. For a nonlinear molecule, the standard molar rotational internal energy contribution is

---

\* Corresponding author at: No. 79 Yingze West Street, Taiyuan 030024, China. Tel.: +86 351 6018239; Fax: +86 351 6041237 E-mail address: [zhangriguang@tyut.edu.cn](mailto:zhangriguang@tyut.edu.cn) (Riguang Zhang); [wangbaojun@tyut.edu.cn](mailto:wangbaojun@tyut.edu.cn); [quantumtyut@126.com](mailto:quantumtyut@126.com) (Baojun Wang)

$$U_{rot}^o = \frac{3}{2} RT$$

The standard molar rotational entropy contribution is

$$S_{rot}^o = R \left[ \ln \left( \frac{8\pi^2 \sqrt{8\pi^3 I_x I_y I_z} (k_B T)^{3/2}}{\sigma h^3} \right) + \frac{3}{2} \right]$$

where  $I_x$ ,  $I_y$ , and  $I_z$  are the three moments of inertia about the principal axes and  $\sigma$  is the rotational symmetry number.

If it is a linear gaseous molecule, the corresponding standard molar internal energy and entropy contribution are

$$U_{rot}^o (linear) = RT$$

$$S_{rot}^o (linear) = R \left[ \ln \left( \frac{8\pi^2 (k_B T)}{\sigma h^3} \right) + \frac{3}{2} \right]$$

where  $I$  is the moment of inertia of the linear molecule.

As for the tightly bound species including the remaining reactants, transition states, intermediates and products, the translational and rotational modes are replaced by vibrational modes corresponding to frustrated translation and rotation on the surface. Consequently, the internal energy change and entropy of the tightly adsorbed species are given by follows:

$$U_{vib}^o = RT \sum_i \frac{h\nu_i / k_B T}{e^{h\nu_i / k_B T} - 1}$$

$$S^o = R \sum_{i=1}^n \left[ -\ln(1 - e^{-h\nu_i / k_B T}) + \frac{h\nu_i / k_B T}{e^{h\nu_i / k_B T} - 1} \right]$$

For the weakly bound species,  $CH_4$ ,  $C_2H_6$  and  $C_3H_8$ , only the entropy of  $CH_4$  in the gas phase at 500 K is obtained from *JANAF book*,<sup>2</sup> which is consistent with the results of NIST Chemistry WebBook.<sup>3</sup> Meanwhile, the tightly bound species, CO, has been also obtained. As shown in [Table S1](#), the  $TS$  and  $T\Delta S$  values of CO and  $CH_4$  species between that obtained by equation (5) and the experiment value obtained from *JANAF book* are compared; the results show that the experimental

values are in agreement with the calculated data, especially for the tightly bound CO species. As a result, we think the entropy change obtained by vibrational modes in our present study is reliable.

**Table S1** The entropy change comparison between experimental value and formula data of CO and CH<sub>4</sub> species on Co(10-11) surface at 500 K.

|                 | Adsorbed State<br>$TS/\text{kJ}\cdot\text{mol}^{-1}$ | Gas State/ $\text{kJ}\cdot\text{mol}^{-1}$ |                    | $T\Delta S_{\text{Exp.}}/\text{kJ}\cdot\text{mol}^{-1}$ | $T\Delta S_{\text{Cal.}}/\text{kJ}\cdot\text{mol}^{-1}$ |
|-----------------|------------------------------------------------------|--------------------------------------------|--------------------|---------------------------------------------------------|---------------------------------------------------------|
|                 |                                                      | $TS_{\text{Exp.}}$                         | $TS_{\text{Cal.}}$ |                                                         |                                                         |
| CO              | 21.8                                                 | 106.4                                      | 103.0              | 84.6                                                    | 81.2                                                    |
| CH <sub>4</sub> | 74.1                                                 | 103.5                                      | 93.4               | 29.4                                                    | 19.3                                                    |

## 2. Adsorption of all possible species

The adsorption of all possible species involving in the C–C chain growth from CH<sub>x</sub> to C<sub>3</sub>H<sub>8</sub> over four adsorption sites of Co(10-11) surface have been examined, and the most stable adsorption configurations are presented in Figure 2, the corresponding adsorption free energies and the key structural parameters are listed in Table 1.

**C, H, O, CO** C and O atoms prefer to adsorb at the 4-fold site; H atom prefers to adsorb at the Fcc site; CO adsorbs via C atom at the 4-fold site with the C–O bond perpendicular to the surface. The adsorption free energies of C, H, O and CO are 797.8, 253.4, 599.9 and 110.1 kJ·mol<sup>-1</sup>, respectively.

**CHO, CH<sub>2</sub>O, CH<sub>3</sub>O** CHO and CH<sub>2</sub>O are bound at the 4-fold site with the bridge(C)-bridge (O) configurations; CH<sub>3</sub>O adsorbs at the Fcc site via O atom. The adsorption free energies of CHO, CH<sub>2</sub>O and CH<sub>3</sub>O are 205.6, 131.7 and 255.3 kJ·mol<sup>-1</sup>, respectively.

**CHOH, CH<sub>2</sub>OH, CH<sub>3</sub>OH** CHOH prefers to adsorb at the Bridge site via C atom with an adsorption free energy of 154.0 kJ·mol<sup>-1</sup>; CH<sub>2</sub>OH prefers to adsorb at the Bridge site via both C and O atoms, the C–O bond is almost parallel to the surface with an adsorption free energy of 123.6

$\text{kJ}\cdot\text{mol}^{-1}$ ;  $\text{CH}_3\text{OH}$  prefers to adsorb at the top site via O atom with an adsorption free energy of  $19.6 \text{ kJ}\cdot\text{mol}^{-1}$ .

**$\text{CH}$ ,  $\text{CH}_2$ ,  $\text{CH}_3$ ,  $\text{CH}_4$**   $\text{CH}$  adsorbs at the 4-fold site via C atom;  $\text{CH}_2$  and  $\text{CH}_3$  prefers to adsorb at the Fcc site, the corresponding adsorption free energies of  $\text{CH}$ ,  $\text{CH}_2$  and  $\text{CH}_3$  are 615.4, 345.9 and  $145.9 \text{ kJ}\cdot\text{mol}^{-1}$ , respectively;  $\text{CH}_4$  is weakly bound to the surface with only an adsorption free energy of  $9.5 \text{ kJ}\cdot\text{mol}^{-1}$ .

**$\text{C}_2\text{H}_2$ ,  $\text{CH}_2\text{CH}$ ,  $\text{CH}_3\text{CH}$ ,  $\text{C}_2\text{H}_4$ ,  $\text{CH}_3\text{CH}_2$ ,  $\text{C}_2\text{H}_6$**   $\text{C}_2\text{H}_2$  prefers to adsorb at the 4-fold site via  $\alpha$ -C atoms with the adsorption free energy of  $209.0 \text{ kJ}\cdot\text{mol}^{-1}$ ;  $\text{CH}_2\text{CH}$  prefers to the Fcc via  $\alpha$ -C with the adsorption free energy of  $242.7 \text{ kJ}\cdot\text{mol}^{-1}$ ;  $\text{CH}_3\text{CH}$  adsorbs at the Fcc site via  $\alpha$ -C atom with the adsorption free energy of  $330.2 \text{ kJ}\cdot\text{mol}^{-1}$ ;  $\text{C}_2\text{H}_4$  adsorbs at the Top via  $\alpha$ -C and the bridge site  $\beta$ -C with the adsorption free energy of  $53.1 \text{ kJ}\cdot\text{mol}^{-1}$ ; the adsorption configurations of  $\text{CH}_3\text{CH}_2$  and  $\text{C}_2\text{H}_6$  are similar to  $\text{CH}_3$  and  $\text{CH}_4$ , respectively, the corresponding adsorption free energies are 131.6 and  $1.8 \text{ kJ}\cdot\text{mol}^{-1}$ , respectively.

**$\text{C}_2$ ,  $\text{CCO}$ ,  $\text{CHCO}$ ,  $\text{CH}_2\text{CO}$ ,  $\text{CH}_3\text{CO}$**   $\text{C}_2$  and  $\text{CCO}$  is stably adsorbed via the 4-fold site via  $\beta$ -C with the adsorption free energy of 684.1 and  $484.3 \text{ kJ}\cdot\text{mol}^{-1}$ .  $\text{CHCO}$  is stably adsorbed via the Fcc( $\alpha$ -C) and Hcp( $\beta$ -C) configuration with the adsorption free energy of  $293.5 \text{ kJ}\cdot\text{mol}^{-1}$ .  $\text{CH}_2\text{CO}$  is stably adsorbed via the 4-fold configuration with the adsorption free energy of  $117.1 \text{ kJ}\cdot\text{mol}^{-1}$ .  $\text{CH}_3\text{CO}$  is stably adsorbed via the 4-fold configuration an adsorption free energy of  $199.0 \text{ kJ}\cdot\text{mol}^{-1}$ .

**$\text{CHCHO}$ ,  $\text{CH}_2\text{CHO}$ ,  $\text{CH}_3\text{CHO}$ ,  $\text{CH}_3\text{CH}_2\text{O}$**  The adsorption of  $\text{CH}_x\text{CHO}$  follow a similar trend with  $\text{CH}_x\text{CO}$ .  $\text{CHCHO}$  prefers to the bridge( $\beta$ -C)-bridge(O) configuration with the adsorption free energy of  $420.9 \text{ kJ}\cdot\text{mol}^{-1}$ . With the increasing of H atom, both  $\text{CH}_2\text{CHO}$  and  $\text{CH}_3\text{CHO}$  are adsorbed at the 4-fold site via the bridge( $\alpha$ -C) configurations, respectively, the corresponding adsorption free energies of  $\text{CH}_2\text{CHO}$  and  $\text{CH}_3\text{CHO}$  are 203.6 and  $54.6 \text{ kJ}\cdot\text{mol}^{-1}$ , respectively.  $\text{CH}_3\text{CH}_2\text{O}$  prefers to

adsorbs at the Fcc site via O atoms with the adsorption free energy  $259.1 \text{ kJ}\cdot\text{mol}^{-1}$ , in which the C–O bond is perpendicular to the Fcc site.

***CHCHOH, CH<sub>2</sub>CHOH, CH<sub>3</sub>CHOH, C<sub>2</sub>H<sub>5</sub>OH*** CHCHOH prefers to the bridge site via  $\alpha$ -C and  $\beta$ -C configuration with the adsorption free energy of  $246.5 \text{ kJ}\cdot\text{mol}^{-1}$ ; both CH<sub>2</sub>CHOH and CH<sub>3</sub>CHOH are adsorbed at the bridge sites via the top( $\alpha$ -C)-top(O) configurations, which have the corresponding adsorption free energies of 56.4 and  $97.0 \text{ kJ}\cdot\text{mol}^{-1}$ , respectively. C<sub>2</sub>H<sub>5</sub>OH prefers to adsorbs at the top site via O atom with an adsorption free energies of  $15.1 \text{ kJ}\cdot\text{mol}^{-1}$ .

***CH<sub>3</sub>CHCH, CH<sub>3</sub>CH<sub>2</sub>CH, CH<sub>3</sub>CH<sub>2</sub>CH<sub>2</sub>, C<sub>3</sub>H<sub>8</sub>*** CH<sub>3</sub>CHCH prefers to Fcc site with the corresponding adsorption free energies of  $235.2 \text{ kJ}\cdot\text{mol}^{-1}$ . The adsorption configurations of CH<sub>3</sub>CH<sub>2</sub>CH, CH<sub>3</sub>CH<sub>2</sub>CH<sub>2</sub> and C<sub>3</sub>H<sub>8</sub> are similar to CH<sub>3</sub>CH, CH<sub>3</sub>CH<sub>2</sub> and C<sub>2</sub>H<sub>6</sub>, respectively, the corresponding adsorption free energies are 340.2, 129.9 and  $-0.5 \text{ kJ}\cdot\text{mol}^{-1}$ , respectively, we can see that C<sub>3</sub>H<sub>8</sub> is weak adsorption.

***CH<sub>3</sub>CHCHO, CH<sub>3</sub>CH<sub>2</sub>CHO, CH<sub>3</sub>CH<sub>2</sub>CH<sub>2</sub>O*** CH<sub>3</sub>CHCHO prefers to 4-fold site with the corresponding adsorption free energies of  $181.6 \text{ kJ}\cdot\text{mol}^{-1}$ . The adsorption configurations CH<sub>3</sub>CH<sub>2</sub>CHO and CH<sub>3</sub>CH<sub>2</sub>CH<sub>2</sub>O are similar to that of CH<sub>3</sub>CHO and CH<sub>3</sub>CH<sub>2</sub>O, respectively, the corresponding adsorption free energies are 64.6 and  $251.1 \text{ kJ}\cdot\text{mol}^{-1}$ , respectively.

***CH<sub>3</sub>CHCHOH, CH<sub>3</sub>CH<sub>2</sub>CHOH, C<sub>3</sub>H<sub>7</sub>OH*** CH<sub>3</sub>CHCHOH prefers to Bridge site with the corresponding adsorption free energies of  $23.6 \text{ kJ}\cdot\text{mol}^{-1}$ . The adsorption configurations of CH<sub>3</sub>CH<sub>2</sub>CHOH and C<sub>3</sub>H<sub>7</sub>OH are similar to CH<sub>3</sub>CHOH and CH<sub>3</sub>CH<sub>2</sub>OH, respectively, the corresponding adsorption free energies are 93.7 and  $15.2 \text{ kJ}\cdot\text{mol}^{-1}$ , respectively.

### 3. CO Initial Activation and CH<sub>3</sub>OH Formation

In **R1**, CO direct dissociation can form C+O via TS1, the C–O distance increases to 2.88 Å from 1.86 Å in TS1, the activation free energy is 153.7 kJ·mol<sup>-1</sup> with the reaction rate constant of  $0.24 \times 10^{-2} \text{ s}^{-1}$ , and the reaction free energy is -28.8 kJ·mol<sup>-1</sup>.

In **R2**, CO can hydrogenate to form CHO via TS2, the C–H distance decreases to 1.39 Å in TS2 from 2.85 Å in CO+H, the activation free energy is 112.8 kJ·mol<sup>-1</sup> with the rate constant of  $4.66 \times 10^1 \text{ s}^{-1}$ , and the reaction free energy is 84.0 kJ·mol<sup>-1</sup>.

In **R3** CHO can dissociate into CH+O via TS3, the C–O distance increases to 1.79 Å in TS3, the activation free energy is 96.6 kJ·mol<sup>-1</sup> with the rate constant of  $2.30 \times 10^3 \text{ s}^{-1}$ , and the reaction free energy is -58.4 kJ·mol<sup>-1</sup>.

In addition, the effect of supercell size, thermal energy and entropy to the standard molar Gibbs free energies on the activation energy and reaction energy of the reactions related to CO activation on Co(10-11) surface is shown in Table S2.

**Table S2** The activation energies and reaction energies of the reactions related to CO activation on Co(10-11) surface in our study and Liu's paper (J. Am. Chem. Soc., 2013, 135 16284–16287).

| Reaction                 | CO→C+O                      | CO+H→CHO     | CHO→CH+O      | CO+H→CH+O    |
|--------------------------|-----------------------------|--------------|---------------|--------------|
| Model and method         | $(E_a, \Delta E)/\text{eV}$ |              |               |              |
| <i>p</i> (2x2) Ours      | (1.30, -0.90)               | (1.19, 0.74) | (0.71, -0.59) | (1.45, 0.15) |
| <i>p</i> (2x2) Liu's     | (1.21, -0.83)               | (1.29, 0.85) | (0.59, -0.72) | (1.44, 0.13) |
| <i>p</i> (3x2) Our DFT   | (1.46, -0.42)               | (1.11, 0.69) | (0.92, -0.58) | (1.61, 0.11) |
| <i>p</i> (3x2) Our DFT+G | (1.42, -0.30)               | (1.17, 0.87) | (1.00, -0.61) | (1.87, 0.26) |

In **R4**, CHO hydrogenation can form CHOH via TS4, in TS4, the O–H distance decreases to 1.50 Å from 3.05 Å in CHO+H, this reaction has an activation free energy of 162.1 kJ·mol<sup>-1</sup>, it is endothermic by 93.9 kJ·mol<sup>-1</sup>.

In **R5**, CHO hydrogenation can form CH<sub>2</sub>O via TS5, in TS5, the C–H distance is shortened to 1.58 Å from 2.49 Å in CHO+H, this elementary reaction has an activation free energy of 61.3 kJ·mol<sup>-1</sup>, and it is endothermic by 27.2 kJ·mol<sup>-1</sup>.

In **R6**, CH<sub>2</sub>O can also hydrogenate to form CH<sub>2</sub>OH via TS6, in TS6, the C–H distance is shortened to 1.35 Å from 2.73 Å in CH<sub>2</sub>O+H, this elementary reaction has an activation free energy of 141.9 kJ·mol<sup>-1</sup>, and it is endothermic by 92.3 kJ·mol<sup>-1</sup>.

In **R7**, CH<sub>2</sub>O directly dissociates into CH<sub>2</sub>+O via TS7, the C–O distance increases to 2.07 Å in TS7 and 3.04 Å in CH<sub>2</sub>+O, this elementary reaction has an activation free energy of 89.2 kJ·mol<sup>-1</sup> with the reaction free energy of -43.2 kJ·mol<sup>-1</sup>.

In **R8**, CH<sub>2</sub>O can be hydrogenated to CH<sub>3</sub>O via TS8, in TS8, the C–H distance is shortened to 2.07 Å from 2.52 Å in CH<sub>2</sub>O+H, this elementary reaction has the activation free energy and reaction free energy of 78.8 and -4.2 kJ·mol<sup>-1</sup>, respectively.

In **R9**, for CH<sub>3</sub>O direct dissociation, the C–O distance is elongated to 1.93 Å in TS9 and 3.54 Å in CH<sub>3</sub>+O, this elementary reaction is exothermic by 59.3 kJ·mol<sup>-1</sup> with an activation free energy of 130.6 kJ·mol<sup>-1</sup>.

In **R10**, CH<sub>3</sub>O hydrogenation can form CH<sub>3</sub>OH via TS10, in TS10, the O–H distance is shortened to 1.33 Å from 2.74 Å in CH<sub>3</sub>O+H, this elementary reaction is endothermic by 77.4 with an activation free energy of 149.5 kJ·mol<sup>-1</sup>.

#### 4. CH<sub>4</sub> Formation

In **R11**, C hydrogenation can form CH via TS11, the C–H distance decreases to 1.48 Å in TS11 from 2.40 Å in C+H, the activation free energy is 77.5 kJ·mol<sup>-1</sup> with the rate constant of  $2.05 \times 10^5 \text{ s}^{-1}$ , and the reaction free energy is 32.7 kJ·mol<sup>-1</sup>.

In **R12**, CH hydrogenation into CH<sub>2</sub> via TS12 has an activation free energy of 116.8 kJ·mol<sup>-1</sup> with the rate constant of  $1.78 \times 10^1 \text{ s}^{-1}$ , it is endothermic by 69.1 kJ·mol<sup>-1</sup>, in TS12, the C–H distance decreases to 1.11 Å from 2.07 Å in CH+H.

In **R13**, for CH<sub>2</sub> hydrogenation to CH<sub>3</sub> via TS13, the C–H distance is shortened from 2.62 Å to 1.70 Å in TS13, the activation free energy is 56.8 kJ·mol<sup>-1</sup> with the rate constant of  $3.25 \times 10^7 \text{ s}^{-1}$ , and it is endothermic by 2.8 kJ·mol<sup>-1</sup>.

In **R14**, for CH<sub>3</sub> hydrogenation to CH<sub>4</sub> via TS14, the C–H distance decreases from 2.82 Å to 1.55 Å, it is exothermic by 49.5 kJ·mol<sup>-1</sup> with the activation free energy of 95.2 kJ·mol<sup>-1</sup> and the rate constant of  $3.19 \times 10^3 \text{ s}^{-1}$ .

## 5. C<sub>2</sub> Hydrocarbons Formation

### 5.1 All reactions related to C species

In **R15**, C self-coupling to C<sub>2</sub> via TS15 has an activation free energy of 208.1 kJ·mol<sup>-1</sup> and the rate constant of  $4.03 \times 10^{-9} \text{ s}^{-1}$ , it is endothermic by 178.2 kJ·mol<sup>-1</sup>, in TS15, the C–C distance decreases to 1.35 Å from 2.75 Å in C+C.

In **R16**, C coupling with CO to form CCO via TS16 needs to overcome an activation free energy of 153.0 kJ·mol<sup>-1</sup> with the reaction free energy of 28.4 kJ·mol<sup>-1</sup>, the reaction rate constant is  $0.29 \times 10^{-2} \text{ s}^{-1}$ , in TS16, the C–C distance decreases to 1.88 Å from 2.88 Å in C+CO.

In **R17**, C coupling with CHO to form CCHO has been considered; however, our results show that this path does not exist.

### 5.2 All reactions related to CH species

In **R18**, CH self-coupling to C<sub>2</sub>H<sub>2</sub> via TS18 needs to overcome an activation free energy of 106.9 kJ·mol<sup>-1</sup> with the reaction free energy of 44.1 kJ·mol<sup>-1</sup>, the reaction rate constant is  $1.09 \times 10^2 \text{ s}^{-1}$ .



<sup>1</sup>, in TS18, the C–C distance decreases to 1.79 Å from 2.73 Å in CH+CH.

In **R19**, CO insertion into CH to CHCO via TS19 is endothermic by 91.2 kJ·mol<sup>-1</sup> with an activation free energy of 143.6 kJ·mol<sup>-1</sup> and the rate constant of  $0.03 \times 10^0 \text{ s}^{-1}$ , in TS19, the C–C distance is shortened to 1.80 Å from 2.81 Å in CH+CO.

In **R20**, CHO insertion into CH to CHCHO via TS20 has an activation free energy and reaction free energy of 97.7 and 18.1 kJ·mol<sup>-1</sup>, respectively; the reaction rate constant is  $1.76 \times 10^3 \text{ s}^{-1}$ , in TS20, the C–C distance is shortened to 1.85 Å from 2.81 Å in CH+CHO.

### 5.3 All reactions related to CH<sub>2</sub> species

In **R21**, CH<sub>2</sub> coupling with CH to form CH<sub>2</sub>CH via TS21 needs to overcome an activation free energy of 122.4 kJ·mol<sup>-1</sup> with the reaction free energy of 46.4 kJ·mol<sup>-1</sup>, the reaction rate constant is  $4.57 \times 10^0 \text{ s}^{-1}$ , in TS21, the C–C distance decreases to 1.94 Å from 3.49 Å in CH<sub>2</sub>+CH.

In **R22**, CH<sub>2</sub> self-coupling to C<sub>2</sub>H<sub>4</sub> via TS22 needs to overcome an activation free energy of 51.0 kJ·mol<sup>-1</sup> with the reaction free energy of -32.8 kJ·mol<sup>-1</sup>, the reaction rate constant is  $1.34 \times 10^8 \text{ s}^{-1}$ , in TS22, the C–C distance decreases to 2.03 Å from 2.74 Å in CH<sub>2</sub>+CH<sub>2</sub>.

In **R23**, CO insertion into CH<sub>2</sub> to CH<sub>2</sub>CO via TS23 is endothermic by 37.8 kJ·mol<sup>-1</sup> with an activation free energy of 106.4 kJ·mol<sup>-1</sup> and a reaction rate constant of  $2.17 \times 10^2 \text{ s}^{-1}$ , in TS23, the C–C distance is shortened to 1.95 Å from 2.88 Å in CH<sub>2</sub>+CO.

In **R24**, CHO insertion into CH<sub>2</sub> to CH<sub>2</sub>CHO via TS24 has an activation free energy and reaction free energy of 61.4 and -22.2 kJ·mol<sup>-1</sup>, respectively, and the reaction rate constant is  $1.10 \times 10^7 \text{ s}^{-1}$ , in TS24, the C–C distance is shortened to 1.98 Å from 2.66 Å in CH<sub>2</sub>+CHO.

### 5.4 All reactions related to CH<sub>3</sub> species

In **R25**, CH<sub>3</sub> coupling with CH to form CH<sub>3</sub>CH via TS25 needs to overcome an activation free energy of 124.5 kJ·mol<sup>-1</sup> with the reaction free energy of 66.0 kJ·mol<sup>-1</sup>, the reaction rate constant is

$2.77 \times 10^0 \text{ s}^{-1}$ , in TS22, the C–C distance decreases to 1.51 Å from 3.52 Å in  $\text{CH}_3 + \text{CH}$ .

In **R26**,  $\text{CH}_3$  coupling with  $\text{CH}_2$  to  $\text{CH}_3\text{CH}_2$  via TS26 has an activation free energy of 83.4  $\text{kJ} \cdot \text{mol}^{-1}$  with the reaction free energy of  $-9.8 \text{ kJ} \cdot \text{mol}^{-1}$ , the reaction rate constant is  $2.52 \times 10^4 \text{ s}^{-1}$ , in TS26, the C–C distance decreases to 2.09 Å from 2.92 Å in  $\text{CH}_3 + \text{CH}_2$ .

In **R27**,  $\text{CH}_3$  self-coupling to form  $\text{C}_2\text{H}_6$  via TS27 needs to overcome an activation free energy of 241.3  $\text{kJ} \cdot \text{mol}^{-1}$  with the reaction free energy of  $-13.9 \text{ kJ} \cdot \text{mol}^{-1}$ , the reaction rate constant is  $1.73 \times 10^{-12} \text{ s}^{-1}$ , in TS27, the C–C distance decreases to 2.85 Å from 3.85 Å in  $\text{CH}_3 + \text{CH}_3$ .

In **R28**, CO insertion into  $\text{CH}_3$  to  $\text{CH}_3\text{CO}$  via TS28 is endothermic by 42.8  $\text{kJ} \cdot \text{mol}^{-1}$  with an activation free energy of 147.7  $\text{kJ} \cdot \text{mol}^{-1}$  and the reaction rate constant of  $0.01 \times 10^0 \text{ s}^{-1}$ , in TS28, the C–C distance is shortened to 1.96 Å from 3.13 Å in  $\text{CH}_3 + \text{CO}$ .

In **R29**, CHO insertion into  $\text{CH}_3$  to  $\text{CH}_3\text{CHO}$  via TS29 has an activation free energy and reaction free energy of 100.9 and  $-1.1 \text{ kJ} \cdot \text{mol}^{-1}$ , respectively. The reaction rate constant is  $8.12 \times 10^2 \text{ s}^{-1}$ . In TS29, the C–C distance is shortened to 1.99 Å from 2.85 Å in  $\text{CH}_3 + \text{CHO}$ .

## 5.5 All reactions related to $\text{C}_2\text{H}_2$ and $\text{C}_2\text{H}_4$ species

Starting with  $\text{C}_2\text{H}_2$  species, in **R31**,  $\text{CH}_2\text{CH}$  can be formed by hydrogenation with an activation free barrier of 68.0  $\text{kJ} \cdot \text{mol}^{-1}$  and the reaction free energy of 19.6  $\text{kJ} \cdot \text{mol}^{-1}$ . Then,  $\text{CH}_2\text{CH}$  is further hydrogenated, and the possible products are  $\text{C}_2\text{H}_4$  and  $\text{CH}_3\text{CH}$  in **R32** and **R33**, respectively, the corresponding activation free barriers are 84.5 and 68.1  $\text{kJ} \cdot \text{mol}^{-1}$  with the reaction free energies of  $-33.9$  and  $-27.4 \text{ kJ} \cdot \text{mol}^{-1}$ , respectively, indicating that  $\text{CH}_3\text{CH}$  is easy to be formed. Finally,  $\text{C}_2\text{H}_6$  is formed by  $\text{CH}_3\text{CH}$  successive hydrogenations at the  $\alpha$ -C site.

Starting with  $\text{C}_2\text{H}_4$  species, in **R34**,  $\text{C}_2\text{H}_4$  hydrogenation to  $\text{CH}_3\text{CH}_2$  is endothermic by 11.7  $\text{kJ} \cdot \text{mol}^{-1}$ , which has an activation free barrier of 48.9  $\text{kJ} \cdot \text{mol}^{-1}$ . In **R35**,  $\text{CH}_3\text{CH}$  hydrogenation to  $\text{CH}_3\text{CH}_2$  has an activation free barrier of 59.7  $\text{kJ} \cdot \text{mol}^{-1}$ , and it is endothermic by 18.2  $\text{kJ} \cdot \text{mol}^{-1}$ . In

**R36**,  $\text{CH}_3\text{CH}_2$  hydrogenation to  $\text{C}_2\text{H}_6$  has an activation free barrier of  $86.3 \text{ kJ}\cdot\text{mol}^{-1}$ , and it is exothermic by  $16.1 \text{ kJ}\cdot\text{mol}^{-1}$ .

## 5.6 All reactions related to $\text{CH}_x\text{CHO}(x=1\sim3)$ species

***CHCHO related reactions*** Starting from CHCHO, in **R30**, the C–O bond cleavage of CHCHO can form  $\text{C}_2\text{H}_2$  via TS30, this reaction has the activation free energy and reaction free energy of  $121.5$  and  $-24.3 \text{ kJ}\cdot\text{mol}^{-1}$ , respectively; the reaction rate constant is  $5.75\times 10^0 \text{ s}^{-1}$ . CHCHO hydrogenation can form CHCHOH,  $\text{CH}_2\text{CHO}$  and  $\text{CHCH}_2\text{O}$ , respectively; however, our results show that  $\text{CHCH}_2\text{O}$  intermediate cannot exist.

In **R37**, CHCHO hydrogenation to CHCHOH via TS37 has an activation free energy of  $109.1 \text{ kJ}\cdot\text{mol}^{-1}$  with the reaction rate constant of  $1.12\times 10^2 \text{ s}^{-1}$ , the reaction free energy is  $0.7 \text{ kJ}\cdot\text{mol}^{-1}$ .

In **R38** CHCHO hydrogenation to  $\text{CH}_2\text{CHO}$  via TS38 has the activation free energy and reaction free energy of  $50.0$  and  $28.8 \text{ kJ}\cdot\text{mol}^{-1}$ , respectively, the reaction rate constant is  $1.69\times 10^8 \text{ s}^{-1}$ .

Therefore, CHCHO hydrogenation to  $\text{CH}_2\text{CHO}$  is kinetically favorable than CHCHOH formation and its direct dissociation into  $\text{CHCH}+\text{O}$ .

***CH<sub>2</sub>CHO related reactions*** Once  $\text{CH}_2\text{CHO}$  is formed. In **R39** the C–O bond cleavage of  $\text{CH}_2\text{CHO}$  can form  $\text{CH}_2\text{CH}$  via TS39, this reaction has the activation free energy and reaction free energy of  $109.5$  and  $-30.9 \text{ kJ}\cdot\text{mol}^{-1}$ , respectively, the reaction rate constant is  $1.01\times 10^2 \text{ s}^{-1}$ .  $\text{CH}_2\text{CHO}$  hydrogenation can form  $\text{CH}_2\text{CHOH}$ ,  $\text{CH}_3\text{CHO}$  and  $\text{CH}_2\text{CH}_2\text{O}$ , respectively; however, our results show that  $\text{CH}_2\text{CH}_2\text{O}$  intermediate cannot exist.

In **R40**,  $\text{CH}_2\text{CHO}$  hydrogenation to  $\text{CH}_2\text{CHOH}$  via TS40 has an activation free energy of  $127.1 \text{ kJ}\cdot\text{mol}^{-1}$  with the reaction rate constant of  $1.47\times 10^0 \text{ s}^{-1}$  and the reaction free energy of  $82.8 \text{ kJ}\cdot\text{mol}^{-1}$ .

In **R41**,  $\text{CH}_2\text{CHO}$  hydrogenation to  $\text{CH}_3\text{CHO}$  via TS41 has a lower activation free energy of  $33.1 \text{ kJ}\cdot\text{mol}^{-1}$  with reaction rate constant of  $9.81\times 10^9 \text{ s}^{-1}$  and the reaction free energy of  $8.4 \text{ kJ}\cdot\text{mol}^{-1}$ .

Thus,  $\text{CH}_3\text{CHO}$  formation is more favorable than either  $\text{CH}_2\text{CHOH}$  formation or its direct dissociation into  $\text{CH}_2\text{CH}$  and  $\text{O}$ . Thus,  $\text{CH}_3\text{CHO}$  dissociation and hydrogenation will be examined.

***CH<sub>3</sub>CHO related reactions*** Starting from  $\text{CH}_3\text{CHO}$ , in **R42** the C–O bond cleavage of  $\text{CH}_3\text{CHO}$  can form  $\text{CH}_3\text{CH}$  via TS42 has the activation free energy and reaction free energy of 53.9 and -55.8  $\text{kJ}\cdot\text{mol}^{-1}$ , respectively, the reaction rate constant is  $6.64\times 10^7\text{ s}^{-1}$ .

In **R43**,  $\text{CH}_3\text{CHO}$  hydrogenation to  $\text{CH}_3\text{CHOH}$  via TS43 has an activation free energy of 150.7  $\text{kJ}\cdot\text{mol}^{-1}$  with reaction rate constant of  $0.50\times 10^{-2}\text{ s}^{-1}$  and reaction free energy of 107.0  $\text{kJ}\cdot\text{mol}^{-1}$ .

In **R44**,  $\text{CH}_3\text{CHO}$  hydrogenation to  $\text{CH}_3\text{CH}_2\text{O}$  via TS44 has an activation free energy of 83.4  $\text{kJ}\cdot\text{mol}^{-1}$  with the reaction rate constant of  $5.44\times 10^4\text{ s}^{-1}$  and the reaction free energy of 3.4  $\text{kJ}\cdot\text{mol}^{-1}$ . Again, the formations of  $\text{CH}_3\text{CH}$  and  $\text{CH}_3\text{CH}_2\text{O}$  are more favorable than  $\text{CH}_3\text{CHOH}$  formation. Meanwhile, as mentioned above,  $\text{CH}_3\text{CH}$  successive hydrogenation to form  $\text{C}_2\text{H}_6$  is considered.

## 5.7 All reactions related to $\text{CH}_3\text{CH}_2\text{O}$ species

### ***CH<sub>3</sub>CH<sub>2</sub>O related reactions***

In **R45**, the C–O bond cleavage of  $\text{CH}_3\text{CH}_2\text{O}$  can form  $\text{CH}_3\text{CH}_2$  via TS45, this reaction has the activation free energy and reaction free energy of 113.5 and 1.1  $\text{kJ}\cdot\text{mol}^{-1}$ , respectively, the reaction rate constant is  $3.94\times 10^1\text{ s}^{-1}$ .

In **R46**,  $\text{CH}_3\text{CH}_2\text{O}$  hydrogenation to  $\text{C}_2\text{H}_5\text{OH}$  via TS46 has an activation free energy of 146.5  $\text{kJ}\cdot\text{mol}^{-1}$  with the reaction rate constant of  $0.14\times 10^{-1}\text{ s}^{-1}$  and the reaction free energy of 74.4  $\text{kJ}\cdot\text{mol}^{-1}$ .

It is worth mentioning that the reverse activation free energy of  $\text{CH}_3\text{CHO}$  hydrogenation to  $\text{CH}_3\text{CH}_2\text{O}$  is 80.0  $\text{kJ}\cdot\text{mol}^{-1}$ , which is much lower than the activation free energies of **R45** and **R46**, indicating that  $\text{CH}_3\text{CH}_2\text{O}$  prefers to be dissociated into  $\text{CH}_3\text{CHO}$ .

## 6. C<sub>3</sub> Hydrocarbons Formation

### 6.1 All reactions related to CH<sub>3</sub>CH species

In **R35**, CH<sub>3</sub>CH hydrogenation to CH<sub>3</sub>CH<sub>2</sub> via TS35 has been mentioned above.

In **R47**, CH<sub>3</sub>CH couples with CH via TS47, in TS47, the C–C distance decreases to 2.01 Å from 3.46 Å, it is endothermic by 56.1 kJ·mol<sup>-1</sup> with the activation free energy of 160.9 kJ·mol<sup>-1</sup>, the reaction rate constant is  $0.04 \times 10^{-2} \text{ s}^{-1}$ .

In **R48**, CHO insertion into CH<sub>3</sub>CH via TS48 has an activation free energy of 60.3 kJ·mol<sup>-1</sup> and the reaction rate constant of  $1.42 \times 10^7 \text{ s}^{-1}$ , and it is exothermic by 35.8 kJ·mol<sup>-1</sup>, in TS48, the C–C distance decreases from 2.81 Å to 2.02 Å.

### 6.2 All reactions related to CH<sub>3</sub>CH<sub>2</sub> species

In **R36** CH<sub>3</sub>CH<sub>2</sub> hydrogenation to C<sub>2</sub>H<sub>6</sub> via TS36 has been mentioned above.

In **R49**, CH<sub>3</sub>CH<sub>2</sub> coupling with CH via TS49 is endothermic by 26.1 kJ·mol<sup>-1</sup> with the activation free energy of 145.8 kJ·mol<sup>-1</sup>, the reaction rate constant is  $0.4 \times 10^0 \text{ s}^{-1}$ , in TS49, the C–C distance decreases to 2.32 Å from 3.20 Å,

In **R50**, CHO insertion into CH<sub>3</sub>CH<sub>2</sub> via TS50 has an activation free energy of 102.7 kJ·mol<sup>-1</sup> and a reaction rate constant of  $5.30 \times 10^2 \text{ s}^{-1}$ , and it is exothermic by 18.7 kJ·mol<sup>-1</sup>, in TS50, the C–C distance decreases from 2.06 Å to 3.29 Å.

In **R51**, CH<sub>3</sub>CH<sub>2</sub> coupling with CH<sub>2</sub> via TS51 is exothermic by 33.2 kJ·mol<sup>-1</sup> with the activation free energy of 54.6 kJ·mol<sup>-1</sup>, the reaction rate constant is  $5.47 \times 10^7 \text{ s}^{-1}$ , in TS51, the C–C distance decreases to 2.21 Å from 2.83 Å.

### 6.3 All reactions related to CH<sub>3</sub>CH<sub>x</sub>CHO species

**CH<sub>3</sub>CHCHO related reactions** Starting from CH<sub>3</sub>CHCHO, in **R52**, its dissociation into

CH<sub>3</sub>CHCH has an activation free energy of 125.6 kJ·mol<sup>-1</sup>, and it is exothermic by 46.5 kJ·mol<sup>-1</sup>, the reaction rate constant is 2.10×10<sup>0</sup> s<sup>-1</sup>.

For CH<sub>3</sub>CHCHO hydrogenation to CH<sub>3</sub>CHCHOH, in **R53**, the activation free energy is 138.6 kJ·mol<sup>-1</sup>, the reaction rate constant is 0.56×10<sup>0</sup> s<sup>-1</sup>, it is endothermic by 106.0 kJ·mol<sup>-1</sup>. For its hydrogenation to CH<sub>3</sub>CH<sub>2</sub>CHO, in **R54**, this reaction has an activation free energy of 31.7 kJ·mol<sup>-1</sup> with the reaction rate constant of 6.65×10<sup>10</sup> s<sup>-1</sup>, and it is endothermic by 8.2 kJ·mol<sup>-1</sup>. Thus, CH<sub>3</sub>CH<sub>2</sub>CHO formation by CH<sub>3</sub>CHCHO hydrogenation is kinetically favorable than CH<sub>3</sub>CHCHOH formation and direct dissociation into CH<sub>3</sub>CHCH and O.

**CH<sub>3</sub>CH<sub>2</sub>CHO related reactions** Once CH<sub>3</sub>CH<sub>2</sub>CHO is formed, in **R55**, its dissociation into CH<sub>3</sub>CH<sub>2</sub>CH has an activation energy of 64.6 kJ·mol<sup>-1</sup>, and it is exothermic by 57.5 kJ·mol<sup>-1</sup>, the rate constant is 5.04×10<sup>7</sup> s<sup>-1</sup>.

For CH<sub>3</sub>CH<sub>2</sub>CHO hydrogenation to CH<sub>3</sub>CH<sub>2</sub>CHOH, in **R56**, the activation free energy is 144.6 kJ·mol<sup>-1</sup>, the reaction rate constant is 6.99×10<sup>0</sup> s<sup>-1</sup>, it is endothermic by 109.8 kJ·mol<sup>-1</sup>. For its hydrogenation to CH<sub>3</sub>CH<sub>2</sub>CH<sub>2</sub>O, in **R57**, this reaction has an activation free energy of 128.6 kJ·mol<sup>-1</sup> with the reaction rate constant of 6.28×10<sup>0</sup> s<sup>-1</sup>, and it is exothermic by 4.9 kJ·mol<sup>-1</sup>. Thus, CH<sub>3</sub>CH<sub>2</sub>CHO dissociation into CH<sub>3</sub>CH<sub>2</sub>CH is more favorable than its hydrogenation to CH<sub>3</sub>CH<sub>2</sub>CHOH and CH<sub>3</sub>CH<sub>2</sub>CH<sub>2</sub>O.

#### 6.4 All reactions related to CH<sub>3</sub>CH<sub>2</sub>CH<sub>2</sub>O species

Starting from CH<sub>3</sub>CH<sub>2</sub>CH<sub>2</sub>O, in **R58**, its C–O bond cleavage to form CH<sub>3</sub>CH<sub>2</sub>CH<sub>2</sub> has an activation free energy of 120.5 kJ·mol<sup>-1</sup> with the reaction rate constant of 3.29×10<sup>0</sup> s<sup>-1</sup>, and it is exothermic by 17.6 kJ·mol<sup>-1</sup>. In **R59**, its hydrogenation to C<sub>3</sub>H<sub>7</sub>OH (propanol) has an activation free energy of 159.6 kJ·mol<sup>-1</sup> with the reaction rate constant of 0.50×10<sup>-3</sup> s<sup>-1</sup>, and it is endothermic by 89.2 kJ·mol<sup>-1</sup>. The similar activation free energies of above two reactions indicate that the

formations of  $\text{CH}_3\text{CH}_2\text{CH}_2$  and  $\text{CH}_3\text{CH}_2\text{CH}_2\text{OH}$  (propanol) are competitive kinetically.

It is worth mentioning that the reverse activation free energy of  $\text{CH}_3\text{CH}_2\text{CHO}$  hydrogenation to  $\text{CH}_3\text{CH}_2\text{CH}_2\text{O}$  is  $133.5 \text{ kJ}\cdot\text{mol}^{-1}$ , which is much lower than the activation free energies of **R59**, indicating that  $\text{CH}_3\text{CH}_2\text{CH}_2\text{O}$  prefers to be dissociated into  $\text{CH}_3\text{CH}_2\text{CHO}$  species. In **R60**,  $\text{CH}_3\text{CH}_2\text{CH}$  hydrogenation to  $\text{CH}_3\text{CH}_2\text{CH}_2$  has an activation free barrier of  $74.7 \text{ kJ}\cdot\text{mol}^{-1}$ , and it is endothermic by  $15.2 \text{ kJ}\cdot\text{mol}^{-1}$ . In **R61**,  $\text{CH}_3\text{CH}_2\text{CH}_2$  hydrogenation to  $\text{C}_3\text{H}_8$  has an activation free barrier of  $47.3 \text{ kJ}\cdot\text{mol}^{-1}$ , and it is endothermic by  $14.8 \text{ kJ}\cdot\text{mol}^{-1}$ .

## 7. Microkinetic modeling

In this study, microkinetic modeling is implemented to probe into the catalytic activity and selectivity of major products in syngas conversion on Co(10-11) surface under the typical experimental conditions ( $P_{\text{CO}}=5 \text{ atm}$ ,  $P_{\text{H}_2}=10 \text{ atm}$ , and  $T=500 \text{ K}$ ).

The adsorption reactions of CO and  $\text{H}_2$  are assumed to be in equilibrium, the equilibrium constants were defined as follow:<sup>4,5</sup>

$$K = \exp\left[-(\Delta E_{\text{ads}} - T\Delta S)/k_B T\right]$$

Where  $E_{\text{ads}}$  refers to the adsorption energy of CO or  $\text{H}_2$ ,  $k_B$  is the Boltzmann constant,  $T$  is the reaction temperature and  $\Delta S$  is the entropy change from the gas phase at the reaction temperature, obtained from NIST Chemistry WebBook.<sup>3</sup>

The rate constants have been presented in Table 2 in the main text. The site balance of intermediate species included in the reaction mechanism can be written in terms of coverage ( $\theta_X$ : X=surface species).<sup>4,5</sup>

$$\begin{aligned} &\theta_{\text{CO}} + \theta_{\text{C}} + \theta_{\text{H}} + \theta_{\text{CHO}} + \theta_{\text{CH}_2\text{O}} + \theta_{\text{CH}_3\text{O}} + \theta_{\text{CH}} + \theta_{\text{CH}_2} + \theta_{\text{CH}_3} + \theta_{\text{CHCHO}} + \theta_{\text{CH}_2\text{CHO}} + \theta_{\text{CH}_3\text{CHO}} + \theta_{\text{CH}_3\text{CH}_2\text{O}} + \theta_{\text{C}_2\text{H}_4} \\ &+ \theta_{\text{CH}_3\text{CH}} + \theta_{\text{CH}_3\text{CH}_2} + \theta_{\text{CH}_3\text{CHCHO}} + \theta_{\text{CH}_3\text{CH}_2\text{CHO}} + \theta_{\text{CH}_3\text{CH}_2\text{CH}_2\text{O}} + \theta_{\text{CH}_3\text{CH}_2\text{CH}} + \theta_{\text{CH}_3\text{CH}_2\text{CH}_2} + \theta_* = 1 \end{aligned} \quad [1]$$

The coverage of CO and H are  $\theta_{\text{CO}} = P_{\text{CO}}K_1\theta_*$  and  $\theta_{\text{H}} = P_{\text{H}_2}^{1/2}K_2^{1/2}\theta_*$ . C, CHO,  $\text{CH}_2\text{O}$ ,  $\text{CH}_3\text{O}$ ,

CH, CH<sub>2</sub>, CH<sub>3</sub>, CHCHO, CH<sub>2</sub>CHO, CH<sub>3</sub>CHO, CH<sub>3</sub>CH<sub>2</sub>O, C<sub>2</sub>H<sub>2</sub>, CH<sub>2</sub>CH, C<sub>2</sub>H<sub>4</sub>, CH<sub>3</sub>CH, CH<sub>3</sub>CH<sub>2</sub>CH<sub>3</sub>CHCHO, CH<sub>3</sub>CH<sub>2</sub>CHO, CH<sub>3</sub>CH<sub>2</sub>CH<sub>2</sub>O, CH<sub>3</sub>CH<sub>2</sub>CH and CH<sub>3</sub>CH<sub>2</sub>CH<sub>2</sub> are described according to the pseudo steady-state approximation,<sup>6</sup> in which the production rate and consumption rate are equal for all intermediates:

$$C: \frac{d\theta_C}{dt} = k_1\theta_{CO}\theta_* - k_{11}\theta_C\theta_H = 0 \quad (1)$$

$$\theta_C = \frac{k_1\theta_{CO}\theta_*}{k_{11}\theta_H}$$

$$CHO: \frac{d\theta_{CHO}}{dt} = k_2\theta_{CO}\theta_H - k_3\theta_{CHO}\theta_* - k_5\theta_{CHO}\theta_H - k_{20}\theta_{CH}\theta_{CHO} - k_{48}\theta_{CH_3CH}\theta_{CHO} = 0 \quad (2)$$

$$\theta_{CHO} = \frac{k_2\theta_{CO}\theta_H}{k_3\theta_* + k_5\theta_H + k_{20}\theta_{CH} + k_{48}\theta_{CH_3CH}}$$

$$CH_2O: \frac{d\theta_{CH_2O}}{dt} = k_5\theta_{CHO}\theta_H - k_8\theta_{CH_2O}\theta_H = 0 \quad (3)$$

$$\theta_{CH_2O} = \frac{k_5\theta_{CHO}}{k_8}$$

$$CH_3O: \frac{d\theta_{CH_3O}}{dt} = k_8\theta_{CH_2O}\theta_H - k_{10}\theta_{CH_3O}\theta_H = 0 \quad (4)$$

$$\theta_{CH_3O} = \frac{k_8\theta_{CH_2O}}{k_{10}}$$

$$CH: \frac{d\theta_{CH}}{dt} = k_3\theta_{CHO}\theta_* + k_{11}\theta_C\theta_H - k_{12}\theta_{CH}\theta_H - k_{18}\theta_{CH}^2 - k_{20}\theta_{CH}\theta_{CHO} = 0 \quad (5)$$

$$\theta_{CH} = \frac{-(k_{20}\theta_{CHO} + k_{12}\theta_H) + \sqrt{(k_{20}\theta_{CHO} + k_{12}\theta_H)^2 + 4k_{18}k_3\theta_{CHO}\theta_*}}{2k_{18}}$$

$$CH_2: \frac{d\theta_{CH_2}}{dt} = k_{12}\theta_{CH}\theta_H - k_{13}\theta_{CH_2}\theta_H - k_{22}\theta_{CH_2}^2 - k_{51}\theta_{CH_3CH_2}\theta_{CH_2} = 0 \quad (6)$$

$$\theta_{CH_2} = \frac{-(k_{13}\theta_H + k_{51}\theta_{CH_3CH_2}) + \sqrt{(k_{13}\theta_H + k_{51}\theta_{CH_3CH_2})^2 + 4k_{22}k_{12}\theta_{CH}\theta_H}}{2k_{22}}$$



$$\text{CH}_3: \frac{d\theta_{\text{CH}_3}}{dt} = k_{13}\theta_{\text{CH}_2}\theta_H - k_{14}\theta_{\text{CH}_3}\theta_H = 0 \quad (7)$$

$$\theta_{\text{CH}_3} = \frac{k_{13}\theta_{\text{CH}_2}}{k_{14}}$$

$$\text{CHCHO}: \frac{d\theta_{\text{CHCHO}}}{dt} = k_{20}\theta_{\text{CH}}\theta_{\text{CHO}} - k_{38}\theta_{\text{CHCHO}}\theta_H = 0 \quad (8)$$

$$\theta_{\text{CHCHO}} = \frac{k_{20}\theta_{\text{CH}}\theta_{\text{CHO}}}{k_{38}\theta_H}$$

$$\text{CH}_2\text{CHO}: \frac{d\theta_{\text{CH}_2\text{CHO}}}{dt} = k_{38}\theta_{\text{CHCHO}}\theta_H - k_{41}\theta_{\text{CH}_2\text{CHO}}\theta_H = 0 \quad (9)$$

$$\theta_{\text{CH}_2\text{CHO}} = \frac{k_{41}\theta_{\text{CHCHO}}}{k_{38}}$$

$$\text{CH}_3\text{CHO}: \frac{d\theta_{\text{CH}_3\text{CHO}}}{dt} = k_{41}\theta_{\text{CH}_2\text{CHO}}\theta_H - k_{42}\theta_{\text{CH}_3\text{CHO}}\theta_* - k_{44}\theta_{\text{CH}_3\text{CHO}}\theta_H = 0 \quad (10)$$

$$\theta_{\text{CH}_3\text{CHO}} = \frac{k_{41}\theta_{\text{CH}_2\text{CHO}}P_{\text{H}_2}^{1/2}K_2^{1/2}}{k_{42} + k_{44}P_{\text{H}_2}^{1/2}K_2^{1/2}}$$

$$\text{CH}_3\text{CH}_2\text{O}: \frac{d\theta_{\text{CH}_3\text{CH}_2\text{O}}}{dt} = k_{44}\theta_{\text{CH}_3\text{CHO}}\theta_H - k_{46}\theta_{\text{CH}_3\text{CH}_2\text{O}}\theta_H = 0 \quad (11)$$

$$\theta_{\text{CH}_3\text{CH}_2\text{O}} = \frac{k_{44}\theta_{\text{CH}_3\text{CHO}}}{k_{46}}$$

$$\text{C}_2\text{H}_2: \frac{d\theta_{\text{C}_2\text{H}_2}}{dt} = k_{18}\theta_{\text{CH}}^2 - k_{31}\theta_{\text{C}_2\text{H}_2}\theta_H = 0 \quad (12)$$

$$\theta_{\text{C}_2\text{H}_2} = \frac{k_{18}\theta_{\text{CH}}^2}{k_{31}\theta_H}$$

$$\text{CH}_2\text{CH}: \frac{d\theta_{\text{CH}_2\text{CH}}}{dt} = k_{31}\theta_{\text{C}_2\text{H}_2}\theta_H - k_{32}\theta_{\text{CH}_2\text{CH}}\theta_H = 0 \quad (13)$$

$$\theta_{\text{CH}_2\text{CH}} = \frac{k_{31}\theta_{\text{C}_2\text{H}_2}}{k_{32}}$$

$$\text{CH}_3\text{CH}: \frac{d\theta_{\text{CH}_3\text{CH}}}{dt} = k_{32}\theta_{\text{CH}_2\text{CH}}\theta_H + k_{42}\theta_{\text{CH}_3\text{CHO}}\theta_* - k_{35}\theta_{\text{CH}_3\text{CH}}\theta_H - k_{48}\theta_{\text{CH}_3\text{CH}}\theta_{\text{CHO}} = 0 \quad (14)$$

$$\theta_{CH_3CH} = \frac{k_{32}\theta_{CH_2CH}\theta_H + k_{42}\theta_{CH_3CHO}\theta_*$$

$$k_{35}\theta_H + k_{48}\theta_{CHO}$$

$$C_2H_4: \frac{d\theta_{C_2H_4}}{dt} = k_{22}\theta_{CH_2}^2 - k_{34}\theta_{C_2H_4}\theta_H = 0 \quad (15)$$

$$\theta_{C_2H_4} = \frac{k_{22}\theta_{CH_2}^2}{k_{34}\theta_H}$$

$$CH_3CH_2: \frac{d\theta_{CH_3CH_2}}{dt} = k_{34}\theta_{C_2H_4}\theta_H + k_{35}\theta_{CH_3CH}\theta_H - k_{36}\theta_{CH_3CH_2}\theta_H - k_{51}\theta_{CH_3CH_2}\theta_{CH_2} = 0 \quad (16)$$

$$\theta_{CH_3CH_2} = \frac{k_{34}\theta_{C_2H_4}\theta_H + k_{35}\theta_{CH_3CH}\theta_H}{k_{36}\theta_H + k_{51}\theta_{CH_2}}$$

$$CH_3CHCHO: \frac{d\theta_{CH_3CHCHO}}{dt} = k_{48}\theta_{CH_3CH}\theta_{CHO} - k_{54}\theta_{CH_3CHCHO}\theta_H = 0 \quad (17)$$

$$\theta_{CH_3CHCHO} = \frac{k_{48}\theta_{CH_3CH}\theta_{CHO}}{k_{54}\theta_H}$$

$$CH_3CH_2CHO: \frac{d\theta_{CH_3CH_2CHO}}{dt} = k_{54}\theta_{CH_3CHCHO}\theta_H - k_{55}\theta_{CH_3CH_2CHO}\theta_H - k_{57}\theta_{CH_3CH_2CHO}\theta_* = 0 \quad (18)$$

$$\theta_{CH_3CH_2CHO} = \frac{k_{54}\theta_{CH_3CHCHO}P_{H_2}^{1/2}K_2^{1/2}}{k_{57} + k_{55}P_{H_2}^{1/2}K_2^{1/2}}$$

$$CH_3CH_2CH_2O: \frac{d\theta_{CH_3CH_2CH_2O}}{dt} = k_{57}\theta_{CH_3CH_2CHO}\theta_H - k_{59}\theta_{CH_3CH_2CH_2O}\theta_H = 0 \quad (19)$$

$$\theta_{CH_3CH_2CH_2O} = \frac{k_{57}\theta_{CH_3CH_2CHO}}{k_{59}}$$

$$CH_3CH_2CH: \frac{d\theta_{CH_3CH_2CH}}{dt} = k_{55}\theta_{CH_3CH_2CHO}\theta_* - k_{60}\theta_{CH_3CH_2CH}\theta_H = 0 \quad (20)$$

$$\theta_{CH_3CH_2CH} = \frac{k_{55}\theta_{CH_3CH_2CHO}}{k_{60}P_{H_2}^{1/2}K_2^{1/2}}$$

$$CH_3CH_2CH_2: \frac{d\theta_{CH_3CH_2CH_2}}{dt} = k_{51}\theta_{CH_3CH_2}\theta_{CH_2} + k_{60}\theta_{CH_3CH_2CH}\theta_H - k_{61}\theta_{CH_3CH_2CH_2}\theta_H = 0 \quad (21)$$

$$\theta_{CH_3CH_2CH_2} = \frac{k_{51}\theta_{CH_3CH_2}\theta_{CH_2} + k_{60}\theta_{CH_3CH_2CH}\theta_H}{k_{61}\theta_H}$$

By putting all of the coverage expressions (equations (1)–(21)) into equation [1], we can calculate the coverage of surface free sites  $\theta_*$ . Subsequently, the coverage of all intermediates can be obtained. In fact, in our calculation process of the coverage of all intermediates, R48 reaction is not included in equation (2). If R48 reaction is considered, equation [1] is an unknown equation. The results are very hard to gain.

The rates for each major product ( $\text{CH}_3\text{OH}$ ,  $\text{CH}_4$ ,  $\text{C}_2\text{H}_5\text{OH}$ ,  $\text{C}_2\text{H}_6$ ,  $\text{C}_3\text{H}_7\text{OH}$ , and  $\text{C}_3\text{H}_8$ ) are

$$\begin{aligned} r_{\text{CH}_3\text{OH}} &= k_{10} \theta_{\text{CH}_3\text{O}} \theta_{\text{H}} ; r_{\text{CH}_4} = k_{14} \theta_{\text{CH}_3} \theta_{\text{H}} ; r_{\text{C}_2\text{H}_5\text{OH}} = k_{46} \theta_{\text{CH}_3\text{CH}_2\text{O}} \theta_{\text{H}} ; & r_{\text{C}_2\text{H}_6} &= k_{36} \theta_{\text{CH}_3\text{CH}_2} \theta_{\text{H}} ; \\ r_{\text{C}_3\text{H}_7\text{OH}} &= k_{59} \theta_{\text{CH}_3\text{CH}_2\text{CH}_2\text{O}} \theta_{\text{H}} ; r_{\text{C}_3\text{H}_8} = k_{61} \theta_{\text{CH}_3\text{CH}_2\text{CH}_2} \theta_{\text{H}} . \end{aligned}$$

Here, the relative selectivity is defined by the relative rate for each product, where  $i$  is the  $r_i / (r_{\text{CH}_3\text{OH}} + r_{\text{CH}_4} + r_{\text{C}_2\text{H}_5\text{OH}} + r_{\text{C}_2\text{H}_6} + r_{\text{C}_3\text{H}_7\text{OH}} + r_{\text{C}_3\text{H}_8})$  species of the products.

## References

- [1] R. D. Cortright, J. A. Dumesic, *Adv Catal.*, 2001, **46**, 161–264.
- [2] <http://kinetics.nist.gov/janaf/>
- [3] <http://webbook.nist.gov/chemistry/>.
- [4] Q. L. Tang, Q. J. Hong, Z. P. Liu, *J. Catal.*, 2009, **263**, 114–122.
- [5] Y. M. Choi, P. Liu, *J. Am. Chem. Soc.*, 2009, **131**, 13054–13061.
- [6] P. Liu, A. Logadottir, J. K. Nørskov, *Acta.*, 2003, **48**, 3731–3742.
